# Supplementary material for: Antibiotic-Efficient Genetic Cassette for the TEM-1 β-Lactamase That Improves Plasmid Performance
Source: PubMed Central journal article supplement (PMC8787818; doi:10.1021/acssynbio.1c00393), 2022-01-04
Supplement: sb1c00393_si_001.pdf [file sb1c00393_si_001.pdf]

## Antibiotic-Efficient Genetic Cassette for the TEM-1 $\beta$ -lactamase That Improves Plasmid Performance

Alister J. Cumming<sup>1,#</sup>, Diana Khananisho<sup>1,#</sup>, Ramona Harris<sup>1</sup>, Carolyn N. Bayer<sup>2</sup>, Morten H.H. Nørholm<sup>2,3,4</sup>, Sara Jamshidi<sup>5</sup>, Leopold L. Ilag<sup>5</sup> and Daniel O. Daley<sup>1,3,4</sup>

<sup>1</sup> Department of Biochemistry and Biophysics, Stockholm University, SE106 91, Sweden.

<sup>2</sup> The Novo Nordisk Foundation Center for Biosustainability, Technical University of Denmark, 2800, Denmark.

<sup>3</sup> CloneOpt AB, Upplands Väsby, SE194 68, Sweden.

<sup>4</sup> Mycropt ApS, Kongens Lyngby, 2800, Denmark.

<sup>5</sup> Department of Materials and Environmental Chemistry, Stockholm University, SE106 91, Sweden.

# Denotes that the authors contributed equally to the work

\* Address correspondence to DOD (+46 8 162 910, ddaley@dbb.su.se)

Running Title: An antibiotic-efficient genetic cassette for the TEM-1  $\beta$ -lactamase

A

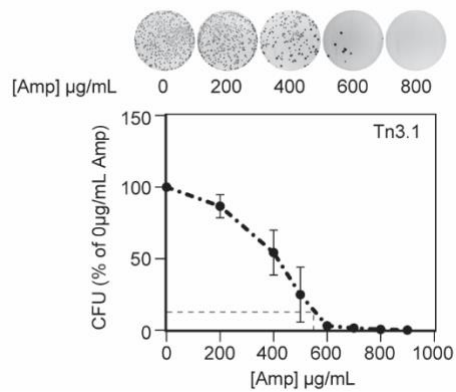

B

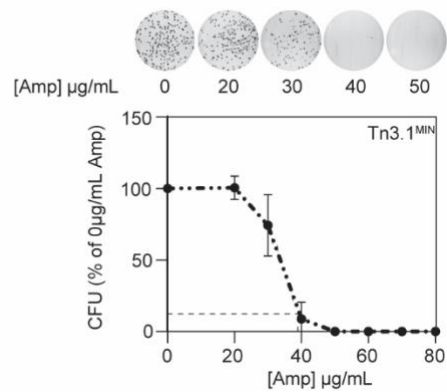

**Figure S1. Excessive resistance conferred by Tn3.1 is mitigated by Tn3.1<sup>MIN</sup> in BL21(DE3) pLysS.** (A) BL21(DE3) pLysS harbouring the *pET15b-sfgfp* (Tn3.1) expression plasmid was plated on LB agar containing different concentrations of ampicillin. Colony numbers were normalised by the number of colonies that grew in the absence of ampicillin. The Minimum Inhibitory Concentration (MIC<sub>90</sub>) of ampicillin required to kill 90 % of cells was extrapolated from the curve (dotted line) and deemed to be approximately 500  $\mu\text{g/mL}$ . (B) As in panel (A) except that BL21(DE3) pLysS harbouring the *pET15b-sfgfp* (Tn3.1<sup>MIN</sup>) plasmid were plated. The MIC<sub>90</sub> was deemed to be approximately 38  $\mu\text{g/mL}$ .

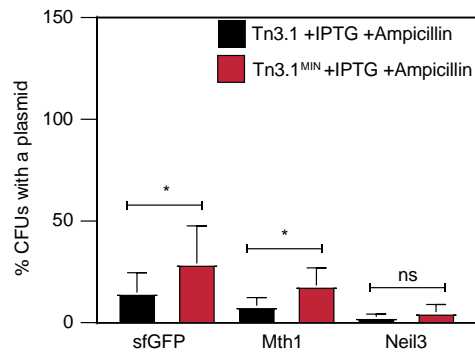

**Figure S2. Tn3.1<sup>MIN</sup> helps cells to maintain a plasmid.** Upon induction of sfGFP, Mth1 or Neil3 production with IPTG, the majority of BL21(*DE3*) did not maintain a plasmid after 20 hours of induction (both Tn3.1 and Tn3.1<sup>MIN</sup>). Data presented as mean  $\pm$  s.d. ( $n \geq 3$ ). A statistically significant difference of  $p < 0.05$  (two-tailed Student's t-test) is denoted by \*.

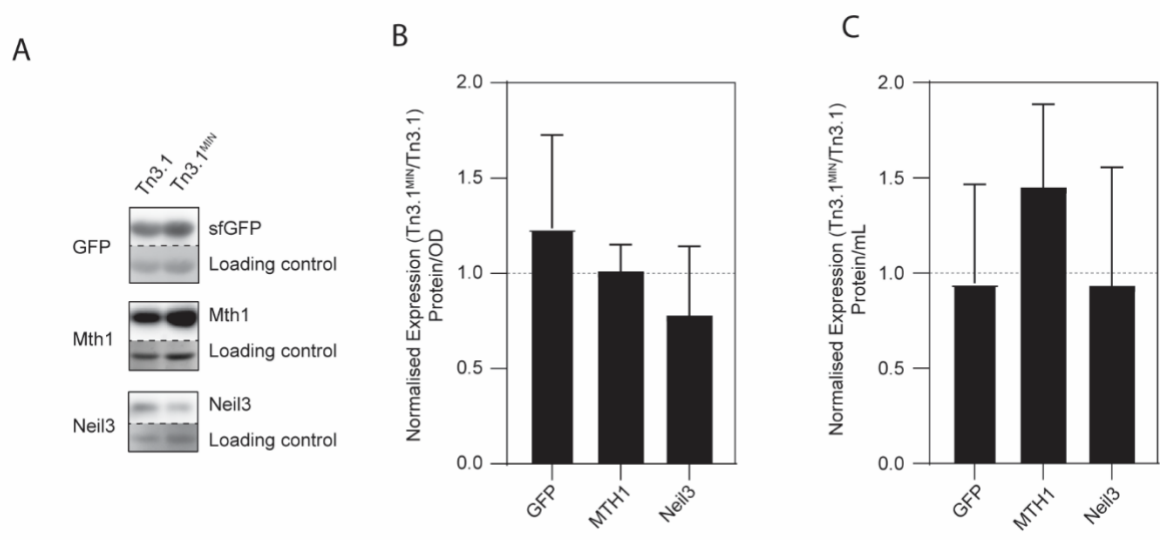

**Figure S3. Tn3.1<sup>MIN</sup> doesn't affect recombinant protein production.** (A) GFP, Mth1 and Neil3 were expressed in BL21(DE3) using *pET15b* (Tn3.1 and Tn3.1<sup>MIN</sup>). Cultures were induced with 0.5 mM IPTG for 20 hours, an OD<sub>600</sub> of 0.05 was harvested and recombinant protein levels were assessed by SDS-PAGE and Western blotting using the HisProbe<sup>®</sup> HRP conjugate. Amido black or Ponceau staining was used for the loading controls. (B) Protein levels were quantified by densitometric analysis of the Western blots in panel A. Normalised expression levels were determined by calculating the ratio Tn3.1<sup>MIN</sup> / Tn3.1. Values shown represent the relative amount of protein / OD<sub>600</sub>. (C) As in B except that values represent the relative amount of protein/mL.

A

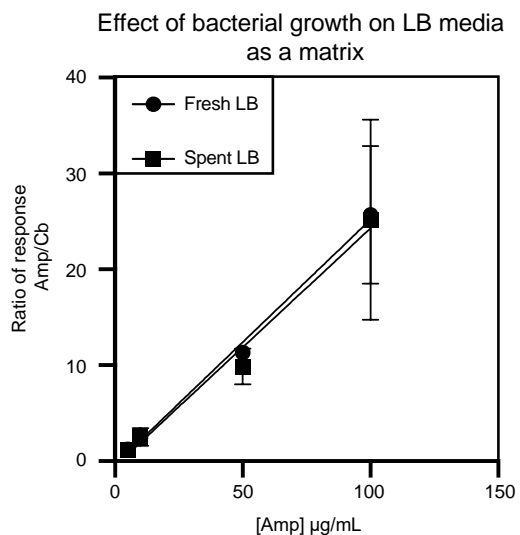

B

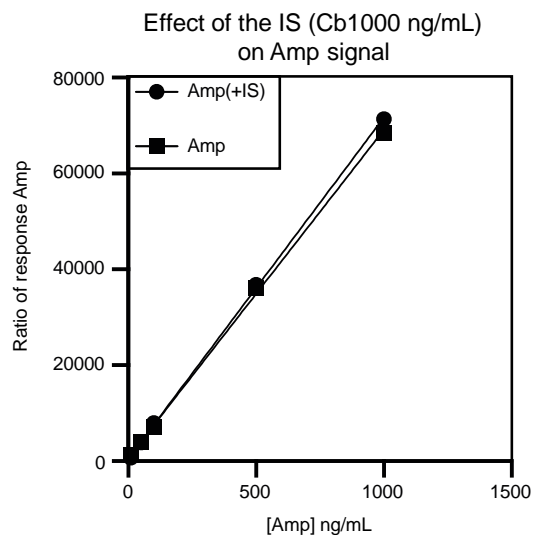

**Figure S4. No significant effect from bacterial growth or IS on the ionisation of ampicillin.** (A) Ampicillin was spiked at different concentrations into both fresh and spent (after 4 hours growth) LB media. Sample preparation was performed including the addition of the IS and MS analysis performed by MS/MS. No significant difference was observed between the two slopes using a regression analysis. (B) Ampicillin was spiked at different concentrations into fresh LB media. Sample preparation was performed including or omitting the addition of the IS and MS analysis performed. No significant difference was observed between the two slopes generated in the presence or absence of the IS (using a regression analysis).

**Table S1. Plasmids used in the study.**

| Plasmid                                     | Origin of replication | Copy number | Ampicillin (µg/mL) | Carbenicillin (µg/mL) |
|---------------------------------------------|-----------------------|-------------|--------------------|-----------------------|
| <i>pET15b-sfgfp</i> (Tn3.1)                 | pBR322                | Med         | 100                | 100                   |
| <i>pET15b-sfgfp</i> (Tn3.1 <sup>MIN</sup> ) | pBR322                | Med         | 20                 | 20                    |
| <i>pSEVA111</i>                             | R6K                   | High        | 100                | Nd                    |
| <i>pSEVA121</i>                             | RK2                   | Med         | 100                | Nd                    |
| <i>pSEVA131</i>                             | pBBR1                 | Med         | 100                | Nd                    |
| <i>pSEVA141</i>                             | pRO1600/ColE1         | High        | 100                | Nd                    |
| <i>pSEVA151</i>                             | RSF1010               | Low/Med     | 100                | Nd                    |
| <i>pSEVA161</i>                             | p15A                  | Med         | 100                | Nd                    |
| <i>pSEVA171</i>                             | pSC101                | Low         | 100                | Nd                    |
| <i>pSEVA181</i>                             | pUC                   | High        | 100                | Nd                    |
| <i>pSEVA191</i>                             | pBR322                | Med         | 100                | Nd                    |
| <i>pSEVA1<sup>MIN</sup>11</i>               | R6K                   | High        | 20                 | Nd                    |
| <i>pSEVA1<sup>MIN</sup>21</i>               | RK2                   | Med         | 20                 | Nd                    |
| <i>pSEVA1<sup>MIN</sup>31</i>               | pBBR1                 | Med         | 20                 | Nd                    |
| <i>pSEVA1<sup>MIN</sup>41</i>               | pRO1600/ColE1         | High        | 20                 | Nd                    |
| <i>pSEVA1<sup>MIN</sup>51</i>               | RSF1010               | Low/Med     | <20                | Nd                    |
| <i>pSEVA1<sup>MIN</sup>61</i>               | p15A                  | Med         | 20                 | Nd                    |
| <i>pSEVA1<sup>MIN</sup>71</i>               | pSC101                | Low         | <20                | Nd                    |
| <i>pSEVA1<sup>MIN</sup>81</i>               | pUC                   | High        | 20                 | Nd                    |
| <i>pSEVA1<sup>MIN</sup>91</i>               | pBR322                | Med         | 20                 | Nd                    |
| <i>pET28a-mCherry</i>                       | pBR322                | Med         | Na                 | Nd                    |

Na denotes 'not applicable'

Nd denotes 'not determined'

**Table S2. Primers used in the study.**

| <b>Oligo Name</b>               | <b>Sequence</b>                                          |
|---------------------------------|----------------------------------------------------------|
| AmpR TIR mut Fwd 1              | CAATAATATTGAAAAAGGNNNNNNATGAGYATHCAACATTTCCGTGTCGCCC     |
| AmpR TIR mut Fwd 2              | CAATAATATTGAAAAAGGNNNNNNATGTCNATHCAACATTTCCGTGTCGCCC     |
| AmpR TIR amp20 Fwd              | CAATAATATTGAAAAAGGGGATGTATGAGTATTCAACATTTCCGTGTCGCCC     |
| AmpR TIR mut Rev 1              | CCTTTTTCAATATTATTGAAGCATTATC                             |
| AmpR TIR Seq primer             | CTTGAAGACGAAAGGGCC                                       |
| pET15 CDS loop out Fwd          | GGATCCGGCTGCTAACAAAGCCGAAAGGAAGCTGAG                     |
| pET15 CDS loop out Fwd          | GGGGAATTGTTATCCGCTCACAATCCCCTATAGTGAGTCG                 |
| Insertion of MTH1 Fwd           | AGCGGCCTGGTGCCGCGCGGCAGCCAT                              |
| Insertion of MTH1 Rev           | CGGGCTTTGTTAGCAGCCGGATCCTTACACGGTATCAACTTCACGCAGGG       |
| Insertion of Neil3 Fwd          | AGCGGCCTGGTGCCGCGCGGCAGCCAT                              |
| Insertion of Neil3 Rev          | GTTAGCAGCCGGATCCTTATTGACAGTGAGGACAGAAATATGTCATTCTGTTATTG |
| BlaCODOP loop out for pSEVA Fwd | CATTCAAATATGTATCCGCTCATGAGACAATAACC                      |
| BlaCODOP loop out for pSEVA Rev | TTACCAATGCTTAATCAGTGAGGCACCTATCTC                        |
| pSEVA loop out Fwd              | CACTGATTAAGCATTGGTAAACCGATACAATTAAGGCTCC                 |
| pSEVA loop out Rev              | GGTTATTGTCTCATGAGCGGATACATATTTGAATG                      |

**Table S3. Optimum tuning parameters for the mass spectrometry of the analytes**

| Main working parameters for the mass spectrometry |                                |             |        |                  |
|---------------------------------------------------|--------------------------------|-------------|--------|------------------|
| Capillary voltage (kV)                            | 3.2                            |             |        |                  |
| Ion source temperature (°C)                       | 150                            |             |        |                  |
| Desolvation temperature (°C)                      | 350                            |             |        |                  |
| Analyte                                           | Parent ion [M+H <sup>+</sup> ] | Product ion | CE (V) | Cone Voltage (V) |
| Ampicillin                                        | 350                            | 174         | 12     | 34               |
|                                                   |                                | 106*        | 20     |                  |
|                                                   |                                | 114         | 26     |                  |
|                                                   |                                | 160         | 12     |                  |
|                                                   |                                | 192         | 12     |                  |
| Carbenicillin                                     | 379                            | 204*        | 22     | 68               |
|                                                   |                                | 220         | 16     |                  |
|                                                   |                                | 160         | 16     |                  |
|                                                   |                                | 114         | 42     |                  |

\* Indicates the product ion used for quantification



**Table S4. Parameters measured and values obtained for each analyte in the method evaluation**

| Analyte              | LOQ <sup>1</sup><br>(ng/ml) | DLR <sup>2</sup><br>(ng/ml) | R <sup>2</sup> | RSD% <sup>3</sup> |                |                | ME% <sup>4</sup> |                |                |       |
|----------------------|-----------------------------|-----------------------------|----------------|-------------------|----------------|----------------|------------------|----------------|----------------|-------|
|                      |                             |                             |                | 5<br>(ng/mL)      | 250<br>(ng/mL) | 400<br>(ng/mL) | 50<br>(ng/mL)    | 100<br>(ng/mL) | 150<br>(ng/mL) |       |
| <b>Ampicillin</b>    | 0.5                         | 0.5-500                     | 0.998          | 12                | 17             | 12             | 6                | -15.2          | -23.8          | -31.5 |
| <b>Carbenicillin</b> | 5                           | 5-500                       | 0.996          |                   | 20             | 6              | 18               | -34.0          | -41.5          | -33.3 |

<sup>1</sup> denotes Limit of Quantification

<sup>2</sup> denotes Dynamic Linear Range

<sup>3</sup> denotes Relative Standard Deviation (precision)

<sup>4</sup> denotes Matrix Effect
